# Supplementary material for: Crystal structure and silica condensing activities of silicatein α–cathepsin L chimeras
Source: Royal Society of Chemistry journal article supplement (doi:10.1039/b718264c), 2008-01-01
Supplement: b718264c.pdf [file b718264c.pdf]

## Crystal structure and silica condensing activities of silicatein $\alpha$ /cathepsin L chimeras.

Michael Fairhead<sup>a</sup>, Kenneth A. Johnson<sup>b</sup>, Stephen A. McMahon<sup>b</sup>, Thomas Kowatz<sup>b</sup>, Lester G. Carter<sup>b</sup>, Muse Oke<sup>b</sup>, Huanting Liu<sup>b</sup>, James H. Naismith<sup>\*b</sup> and Christopher F. van der Walle<sup>\*a</sup>

<sup>a</sup> SIPBS, University of Strathclyde, 27 Taylor Street, Glasgow, Scotland. E-mail: chris.walle@strath.ac.uk

<sup>b</sup> The Centre for Biomolecular Science, University of St. Andrews, North Haugh, St. Andrews, Scotland. E-mail: naismith@st-andrews.ac.uk

### Additional supporting material

#### Molecular biology

The procathepsin-L gene (amino acids 18 to 333) was amplified from clone 6712564 (LGC Promochem) harbouring preprocathepsin-L (UniProtKB/TrEMBL entry P07711) by PCR using primers PCLFP01 (5'-end) and PCLRP01 (3'-end) and ligated into *Pichia pastoris* vector pPICZ- $\alpha$ -B (Invitrogen) which contains a gene for Zeocine<sup>TM</sup> resistance as well as an  $\alpha$  factor secretion signal which leads to secretion of recombinant protein into the growth media. Mutations to the loop region (amino acids 285-294) were made using primers PCLFP01 and LOOPRP01 in a standard PCR protocol, digesting the product with PstI and SspI and ligating into pPICZ- $\alpha$ -procathepsin-L, similarly digested. All other mutations were made using the Quikchange<sup>TM</sup> method (Stratagene) and the sequences confirmed by the University of Dundee Sequencing Service.

| Primer                  | Sequence 5' to 3'                                              | Purpose                                                  |
|-------------------------|----------------------------------------------------------------|----------------------------------------------------------|
| PCLFP01                 | GCGAAGGCTGCAGGAGCTACTCTAACATTTGAT                              | Introduce PstI site                                      |
| PCLRP01                 | GATGGGGTGACACATTGGCGCCTAGAGC                                   | Introduce SacII site                                     |
| CATFPCS <sup>a</sup>    | CAGGGTCAGTGTGGTTCTTCTTGGGCTTTTAGTGCT                           | C25S mutation                                            |
| CATFPASY <sup>a</sup>   | CAGGGTCAGTGTGGTGCTTCTTACGCTTTTAGTGCT<br>ACTG                   | S24A W26Y                                                |
| CATFPLNHAM <sup>a</sup> | GACTGTAGCAGTGAAGACTTGAATCATGCTATGCTG<br>GTGGAAGGC              | M161L, D162N, G164A, V165M<br>mutation                   |
| LOOPRP01                | CACGACCACCAACCGATGCCTAAAATAGAGGTTGTT<br>GGTCTTTATAACCGAC       | <sup>173</sup> ESTESDNN <sup>180</sup> to ISNNQ mutation |
| CATFP2S <sup>a</sup>    | TTTATTTTGTAGCCAGACTGTAGCAGTTCAAGCTTGA<br>ATCATGCTATGCTGGTGGTTG | E159S, D160S mutation                                    |
| CATRP4S <sup>a</sup>    | GTCCTTCCTGTTCTATAAAGAAGGCATTTATTTTCG<br>TCAGACTGTAGCAGTTCAA    | E153S, P154S mutation                                    |

<sup>a</sup> only the forward primer is shown

### Protein expression and purification

*Pichia pastoris* strain X-33 was transformed with plasmid using lithium chloride as described in the Invitrogen Easysselect™ *Pichia* Expression Kit manual. Transformed cells were plated onto YPG-agar plates (2% yeast extract, 2% peptone, 2% glycerol, 2% agar) containing 100 µg/mL of zeocin. After 3 days at 31 °C the resulting colonies were screened for protein expression. Cells were grown in 50 mL of YPG medium in a 250 mL baffled flask (Nalgene, UK) for 48 h at 30 °C. Cells were then transferred to 1000 mL of YPM (2% yeast extract, 2% peptone, 1% methanol) medium and grown in a 2 L baffled flask for 96 h at 20 °C, with fresh methanol added every 24 h. Wet cell biomass at the end of this period was typically 70-80 g/l. The clarified supernatant was concentrated to 40 mL, (NH<sub>4</sub>)<sub>2</sub>SO<sub>4</sub> added to 1 M and loaded onto a 20 mL Phenyl Sepharose 6 Fast Flow column (GE healthcare, UK) pre-equilibrated with buffer A (20 mM Tris.HCl, pH 8.2) + 1 M (NH<sub>4</sub>)<sub>2</sub>SO<sub>4</sub>. After loading, the column was washed with buffer A + 1 M (NH<sub>4</sub>)<sub>2</sub>SO<sub>4</sub>, the protein eluted isocratically in buffer A and desalted. The sample was then loaded onto a 5 mL Q Sepharose column and eluted with a linear gradient from 0 to 1 M NaCl. Protein containing fractions were exchanged into buffer B (20 mM CH<sub>3</sub>COONa pH 5), loaded onto a 5 mL SP Sepharose column and eluted with a linear gradient from 0 to 1 M NaCl. Typically, 20-40 mg of pure protein were obtained per litre of culture supernatant, depending upon the construct being expressed. Processing of inactive procathepsin-L mutants to the mature form was done by incubating 20 mg of the selected mutant with 0.2 mg of activated wild type cathepsin-L in 0.1 M CH<sub>3</sub>COONa pH 5, with 2 mM DTT for 48-96 h at room temperature. Processing was checked by SDS-PAGE and continued until a single band at 24 kDa (mature form) was present. Processed enzyme was then exchanged into 10 mM CH<sub>3</sub>COONa pH 5 and stored at -80 °C.

### Structural Biology

The protein was screened for crystallization against 4 commercial 96-condition screens: 1) Wizard 1 and 2 (Emerald Biosystems); 2) JCSG+, 3) Classics and 4) Pegs (GE Healthcare). Conditions which gave crystals were used to design optimization screens based on a simple stochastic method using in-house software<sup>1</sup>. The crystal used for data collection was obtained by the hanging drop method using protein at 10mg/ml mixed 2µl:1µl with the well solution of 450µl containing 17.36% PEG3350, 0.1M sodium acetate, pH4.5, and 0.1M lithium sulphate. Prior to exposure to X-rays, the crystal was transferred to a cryoprotecting solution containing 20% PEG3350, 0.1M sodium acetate, pH 4.5, 0.1M lithium sulphate and 20% PEG400. The crystal was flash frozen in liquid nitrogen and transported in a dry cryogenic dewar to beamline ID29 at the European Synchrotron Radiation Facility. Data were collected from a single crystal at 100 K at a wavelength of 1.27 Å. The data were indexed and merged using Denzo and Scalepack in the integrated package HKL2000<sup>2</sup>.

The structure was solved using PHASER<sup>3,4</sup> using a monomer of cathepsin (PDB 1MHW) as a model finding four monomers in the asymmetric unit. Manual modification of the protein to convert the sequence to 4SER used COOT<sup>5</sup>. The structure was refined using REFMAC5<sup>6</sup>, TLS parameters, isotropic B-thermal factors and NCS restraints were employed throughout. Water molecules were added using COOT<sup>5</sup>. Structure quality was checked with PROCHECK<sup>7</sup> and MOLPROBITY<sup>8</sup>. The final structure and experimental data were deposited with the PDB<sup>9</sup> and have accession code 2VHS.

**Table 1 X-ray data**

| Data collection              | 4SER                                                                        |
|------------------------------|-----------------------------------------------------------------------------|
| $\lambda$ (Å)                | 1.27                                                                        |
| Resolution<br>Last shell (Å) | 28 – 1.5<br>(1.55 - 1.5)                                                    |
| Spacegroup                   | P1                                                                          |
| Cell (Å)                     | a = 56.8 b = 58.1 c = 70.2<br>$\alpha = 105.7 \beta = 105.0 \gamma = 105.1$ |
| Unique refl's                | 108723                                                                      |
| Average redundancy           | 1.9 (1.7)                                                                   |
| I/ $\sigma$                  | 20 (2.1)                                                                    |
| Complete (%)                 | 92 (74)                                                                     |
| R <sub>merge</sub>           | 0.039 (0.293)                                                               |
|                              |                                                                             |
| Refinement                   |                                                                             |
| R %                          | 18.8 (26.4)                                                                 |
| R <sub>free</sub> %          | 22.0 (32.1)                                                                 |
| rmsd bonds (Å) /angles (°)   | 0.006 / 0.985                                                               |
| Ramach'n favoured (%)        | 98                                                                          |
| PDB accession code           | 2VHS                                                                        |

## REFERENCES

1. B. Rupp, B. W. Segelke, H. I. Krupka, T. P. Lakin, J. Schafer, A. Zemla, D. Toppani, G. Snell and T. Earnest, *Acta Cryst. D*, 2002, **58**, 1514-1518.
2. W. Minor, M. Cymborowski and Z. Otwinowski, *Acta Physica Polonica A*, 2002, **101**, 613-619.
3. A. J. McCoy, R. W. Grosse-Kunstleve, L. C. Storoni and R. J. Read, *Acta Cryst. D*, 2005, **61**, 458-464.
4. L. C. Storoni, A. J. McCoy and R. J. Read, *Acta Cryst. D*, 2004, **60**, 432-438.
5. P. Emsley and K. Cowtan, *Acta Cryst. D*, 2004, **60**, 2126-2132.
6. G. N. Murshudov, A. A. Vagin, A. Lebedev, K. S. Wilson and E. J. Dodson, *Acta Cryst. D*, 1999, **55**, 247-255.
7. R. A. Laskowski, M. W. MacArthur, D. S. Moss and J. M. Thornton, *J. Appl. Cryst.*, 1993, **26**, 548-558.
8. I. W. Davis, L. W. Murray, J. S. Richardson and D. C. Richardson, *Nucleic Acids Res*, 2004, **32**, W615-W619.
9. H. Boutselakis, D. Dimitropoulos, J. Fillon, A. Golovin, K. Henrick, A. Hussain, J. Ionides, M. John, P. A. Keller, E. Krissinel, P. McNeil, A. Naim, R. Newman, T. Oldfield, J. Pineda, A. Rachedi, J. Copeland, A. Sitnov, S. Sobhany, A. Suarez-Uruena, J. Swaminathan, M. Tagari, J. Tate, S. Tromm, S. Velankar and W. Vranken, *Nucleic Acids Res*, 2003, **31**, 458-462.
